# Supplementary material for: Comparison of Different Dietary Fatty Acids Supplement on the Immune Response of Hybrid Grouper (Epinephelus fuscoguttatus × Epinephelus lanceolatus) Challenged with Vibrio vulnificus
Source: MDPI journal article supplement (doi:10.3390/biology11091288), 2022-08-30
Supplement: s1 [file s1]

>*Vibrio vulnificus* isolate 9 16S ribosomal RNA gene, partial sequence

Sequence ID: AY245189.1 Length: 1250

Range 1: 385 to 1083, Score:1242 bits (672), Expect:0.0,

Identities:691/700(99%), Gaps:2/700(0%), Strand: Plus/Plus

|            |                                                                |      |
|------------|----------------------------------------------------------------|------|
| Query 2    | AGCACCGGCTAACTCCGTGCCAGCAGCCGCGTAATACGGAGGGTGCGAGCGTTAATC-G    | 60   |
|            |                                                                |      |
| Sbjct 385  | AGCACCGGCTAACTCCGTGCCAGCAGCCGCGTAATACGGAGGGTGCGAGCGTTAATCGG    | 444  |
| Query 61   | GAATTACTGGGCGTAAAGCGCATGCAGGTGGTTTGTTAAGTCAGATGTGAAAGCCCCGGGG  | 120  |
|            |                                                                |      |
| Sbjct 445  | GAATTACTGGGCGTAAAGCGCATGCAGGTGGTTTGTTAAGTCAGATGTGAAAGCCCCGGGG  | 504  |
| Query 121  | CTCAACCTCGGAATTGCATTTGAAACTGGCAGACTAGAGTACTGTAGAGGGGGGTAGAAT   | 180  |
|            |                                                                |      |
| Sbjct 505  | CTCAACCTCGGAATAGCATTTGAAACTGGCAGACTAGAGTACTGTAGAGGGGGGTAGAAT   | 564  |
| Query 181  | TTCAGGTGTAGCGGTGAAATGCGTAGAGATCTGAAGGAATACCGGTGGCGAAGGCGGCCCC  | 240  |
|            |                                                                |      |
| Sbjct 565  | TTCAGGTGTAGCGGTGAAATGCGTAGAGATCTGAAGGAATACCGGTGGCGAAGGCGGCCCC  | 624  |
| Query 241  | CCTGGACAGATACTGACACTCAGATGCGAAAGCGTGGGGAGCAAACAGGATTAGATACCC   | 300  |
|            |                                                                |      |
| Sbjct 625  | CCTGGACAGATACTGACACTCAGATGCGAAAGCGTGGGGAGCAAACAGGATTAGATACCC   | 684  |
| Query 301  | TGGTAGTCCACGCCGTAAACGATGTCTACTTGGAGGTTGTGGCCTTGAGCCGTGGCTTTC   | 360  |
|            |                                                                |      |
| Sbjct 685  | TGGTAGTCCACGCCGTAAACGATGTCTACTTGGAGGTTGTGGCCTTGAGCCGTGGCTTTC   | 744  |
| Query 361  | GGAGCTAACGCGTTAAGTAGACCGCCTGGGGAGTACGGTCGCAAGATTAAAACTCAAATG   | 420  |
|            |                                                                |      |
| Sbjct 745  | GGAGCTAACGCGTTAAGTAGACCGCCTGGGGAGTACGGTCGCAAGATTAAAACTCAAATG   | 804  |
| Query 421  | AATTGACGGGGGGCCCGCACAAGCGGTGGAGCATGTGGTTTAATTCGATGCAACGCGAAGA  | 480  |
|            |                                                                |      |
| Sbjct 805  | AATTGACGGGGGGCCCGCACAAGCGGTGGAGCATGTGGTTTAATTCGATGCAACGCGAAGA  | 864  |
| Query 481  | ACCTTACCTACTCTTGACATCCAGAGAACTTCCAGAGATGGATTGGTGCCTTCGGGAAC    | 540  |
|            |                                                                |      |
| Sbjct 865  | ACCTTACCTACTCTTGACATCCAGAGAACTTCCAGAGATGGATTGGTGCCTTCGGGAAC    | 924  |
| Query 541  | TCTGAGACAGGTGCTGCATGGCTGTCGTCAGCTCGTGTTGTGAAATGTTGGGTAAAGTCC   | 600  |
|            |                                                                |      |
| Sbjct 925  | TCTGAGACAGGTGCTGCATGGCTGTCGTCAGCTCGTGTTGTGAAATGTTGGGTAAAGTCC   | 984  |
| Query 601  | CGCAACGAGCGCAACCCTTATCCTTGTTTGCCAGCGAGTAATGTCGGGAACCTCAGGGAG   | 660  |
|            |                                                                |      |
| Sbjct 985  | CGCAACGAGCGCAACCCTTATCCTTGTTTGCCAGCACTTCGGGT - GGGAACCTCAGGGAG | 1043 |
| Query 661  | ACTGCCGGTGATAAACCGGAGGAAGGTGGGGACGACGTCA                       | 700  |
|            |                                                                |      |
| Sbjct 1044 | ACTGCCGGTGATAAACCGGAGGAAGGTGGGGACGACGTCA                       | 1083 |

Figure Supplementary S1. The 16S rDNA of partial nucleotide sequence comparison using BLAST in NCBI Genebank database
