# Supplementary material for: Comparison of Different Dietary Fatty Acids Supplement on the Immune Response of Hybrid Grouper (Epinephelus fuscoguttatus × Epinephelus lanceolatus) Challenged with Vibrio vulnificus
Source: MDPI journal article supplement (doi:10.3390/biology11091288), 2022-08-30
Supplement: s1 [file s1]

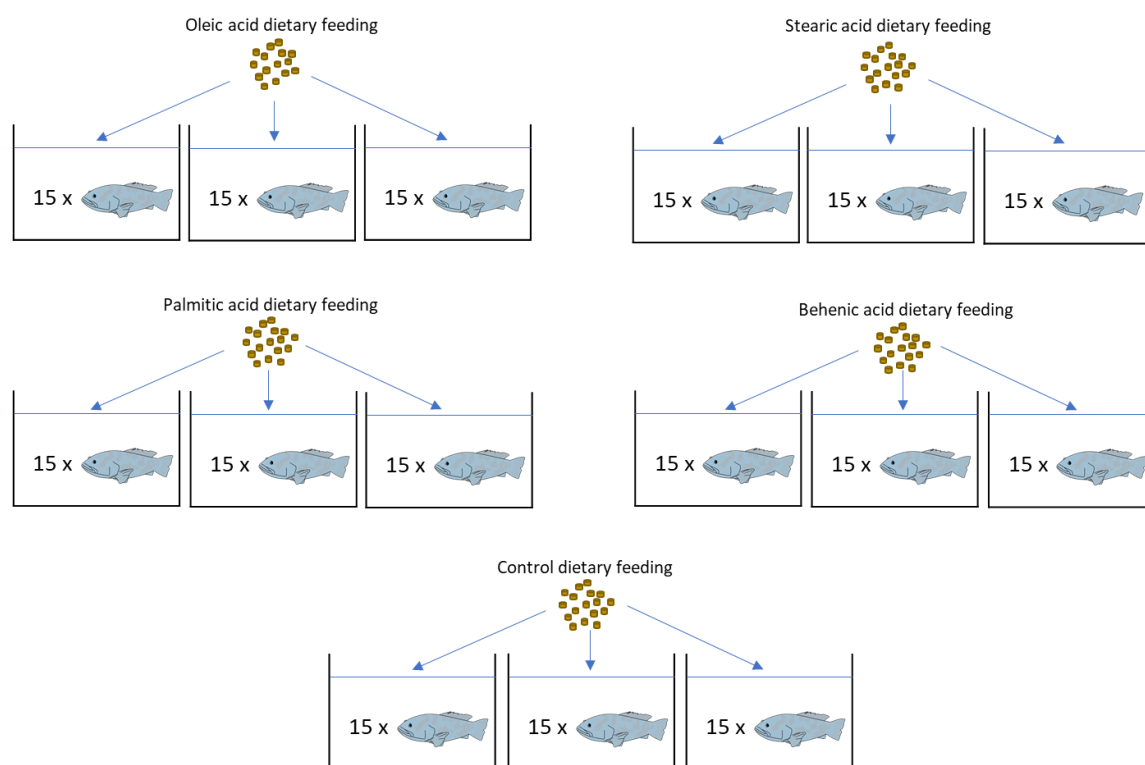

**Supplementary Figure S1.** Diagram of glass aquariums set up for five different fatty acid feeding experiments in three replicates.
